# Supplementary material for: High activity and selectivity of single palladium atom for oxygen hydrogenation to H2O2
Source: PubMed Central journal article supplement (PMC9374736; doi:10.1038/s41467-022-32450-6), 2022-08-12
Supplement: 41467_2022_32450_MOESM1_ESM.pdf [file 41467_2022_32450_MOESM1_ESM.pdf]

## Supplementary Information

### **High activity and selectivity of single palladium atom for oxygen hydrogenation to H<sub>2</sub>O<sub>2</sub>**

Shiming Yu<sup>1</sup>, Xing Cheng<sup>1</sup>, Yueshuai Wang<sup>2</sup>, Bo Xiao<sup>1</sup>, Yiran Xing<sup>1</sup>, Jun Ren<sup>3</sup>, Yue Lu<sup>2</sup>, Hongyi Li<sup>2\*</sup>, Chunqiang Zhuang<sup>2\*</sup>, Ge Chen<sup>1\*</sup>

<sup>1</sup>:Beijing Key Laboratory for Green Catalysis and Separation, Faculty of Environment and Life, Beijing University of Technology, Beijing 100124, P. R. China.

<sup>2</sup>: Faculty of Materials and Manufacturing, Beijing University of Technology.

<sup>3</sup>: North University of China, Taiyuan, 030051, P. R. China.

E-mail of corresponding author: lhy06@bjut.edu.cn;chunqiang.zhuang@bjut.edu.cn;

chengge@bjut.edu.cn

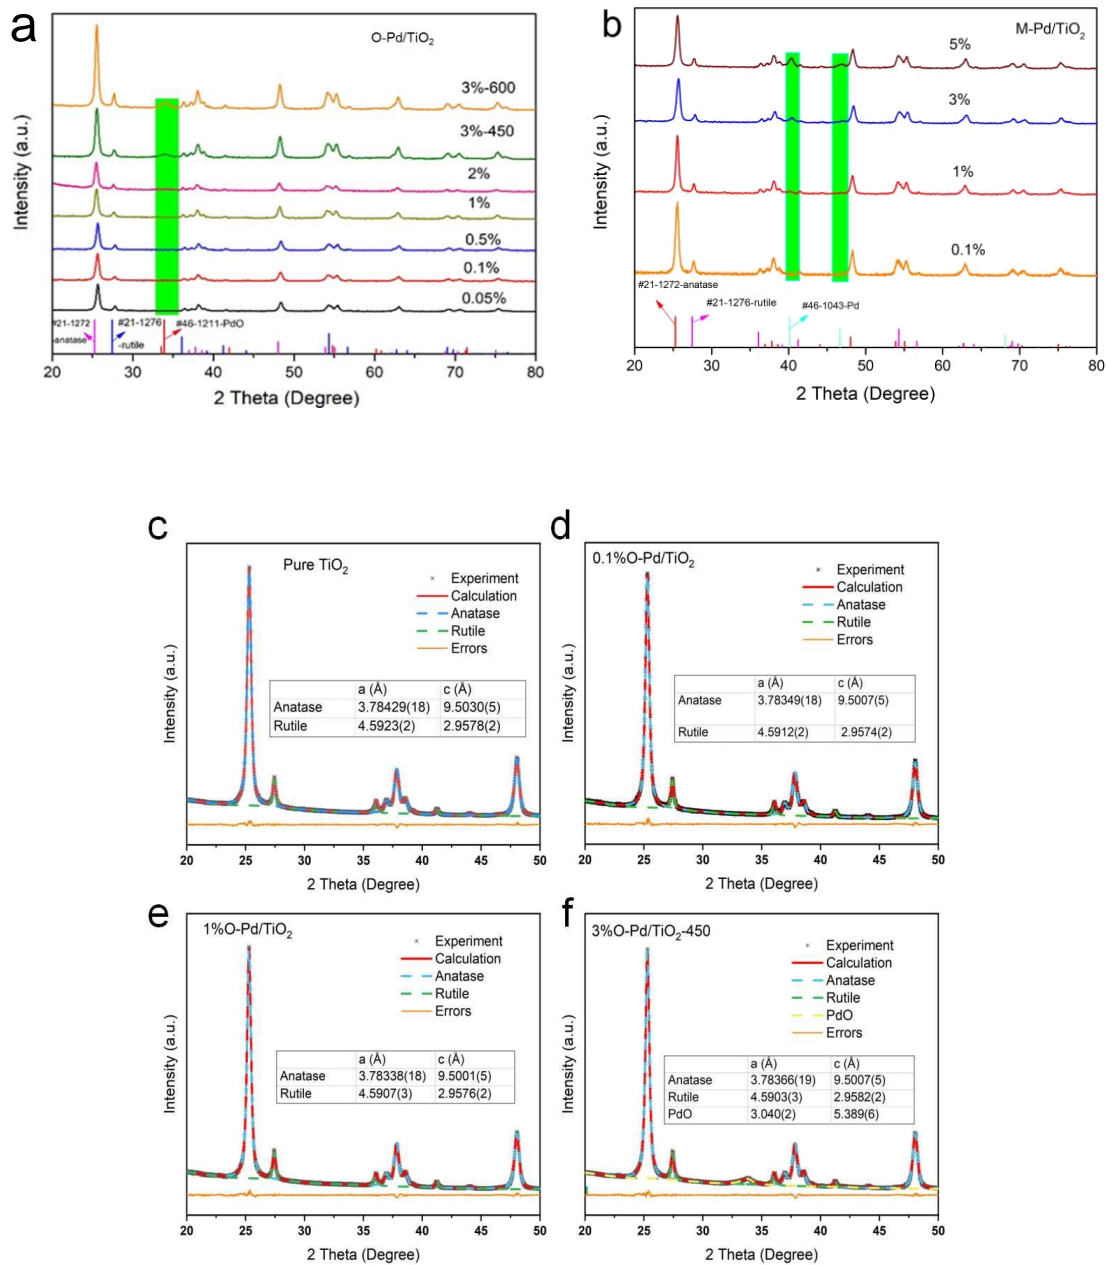

Supplementary Figure 1. XRD characterization of the catalysts. (a) O-Pd/TiO<sub>2</sub> and (b) M-Pd/TiO<sub>2</sub>, (c-f) XRD refinements of different catalysts

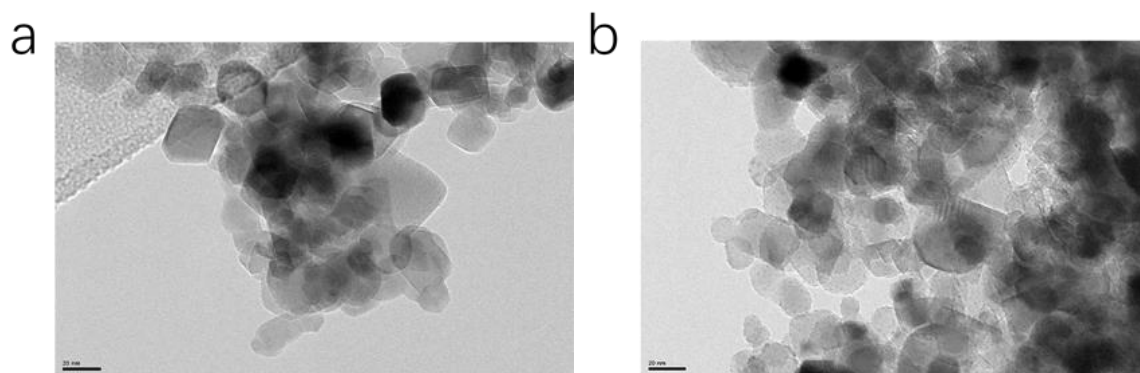

Supplementary Figure 2. Electron microscopic characterization of catalyst. TEM of different catalysts with 20 nm scale bars: (a) 0.1%O-Pd/TiO<sub>2</sub> (b)1%O-Pd/TiO<sub>2</sub>

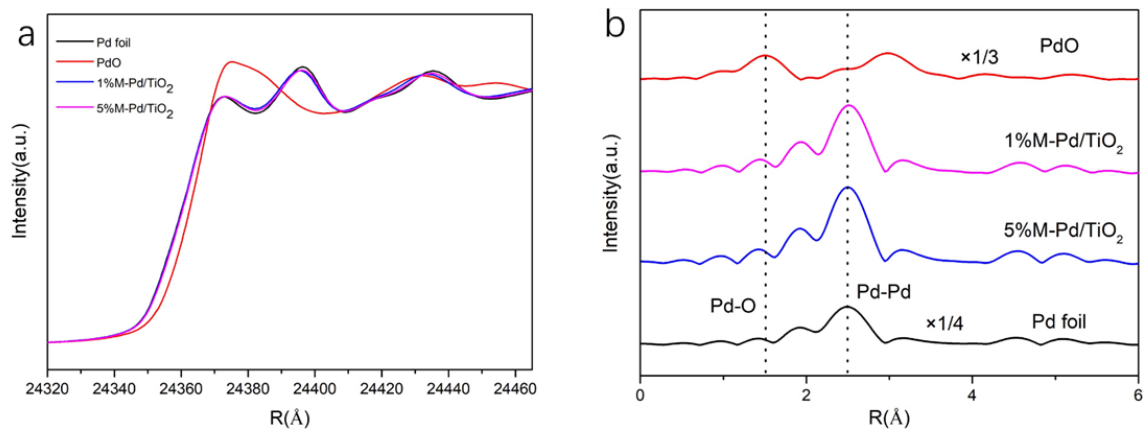

Supplementary Figure 3. X-ray absorption spectrum of catalyst. (a) XANES spectra at the Pd K-edge and (b) the  $k^2$ -weighted Fourier transforms of Pd K-edge EXAFS spectra for M-Pd/TiO<sub>2</sub>, PdO, and Pd foil.

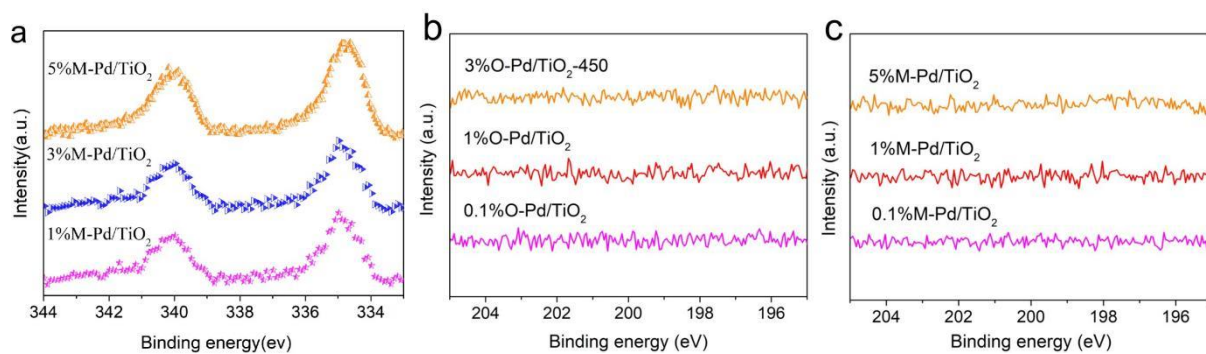

Supplementary Figure 4. The X-ray photoelectron spectra of catalysts. (a) Pd 3d. (b) and (c) Cl 2p

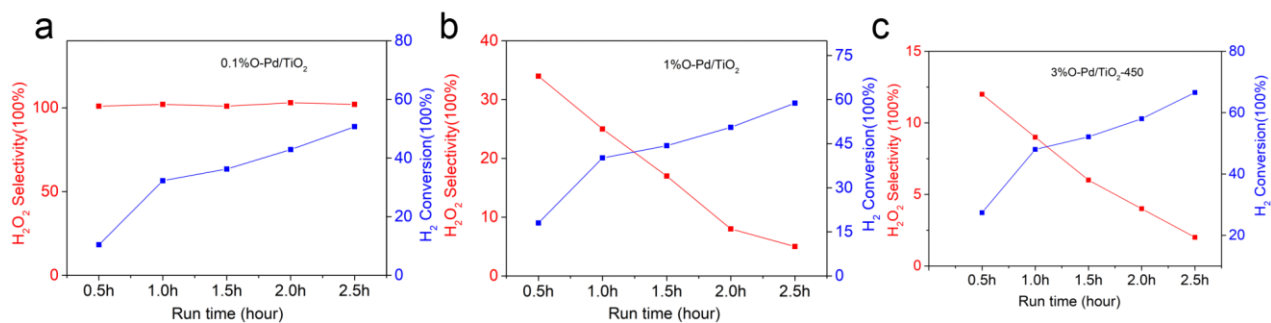

Supplementary Figure 5. H<sub>2</sub> conversion and H<sub>2</sub>O<sub>2</sub> selectivity with different reaction time on various loading catalysts (catalyst feeding: 10 mg). (a) 0.1%O-Pd/TiO<sub>2</sub>. (b) 1%O-Pd/TiO<sub>2</sub>. (c) 3%O-Pd/TiO<sub>2</sub>-450.

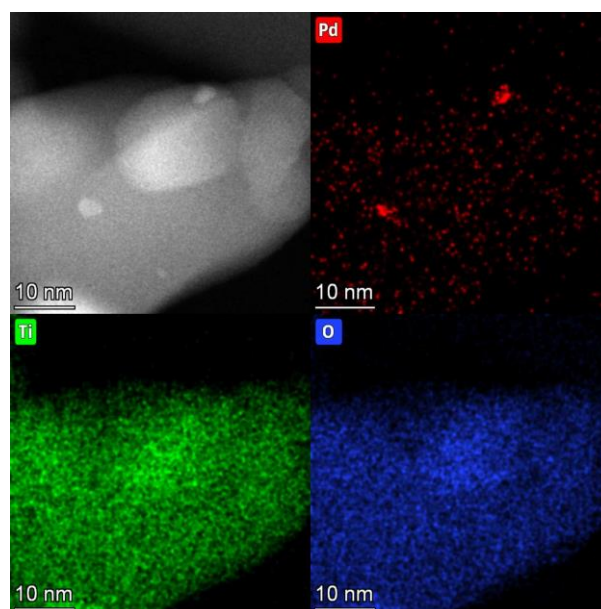

Supplementary Figure 6. STEM Characterization of catalyst after reaction. The HAADF-STEM image of the used 0.1%O-Pd/TiO<sub>2</sub> catalysts with 10 nm scale bars.

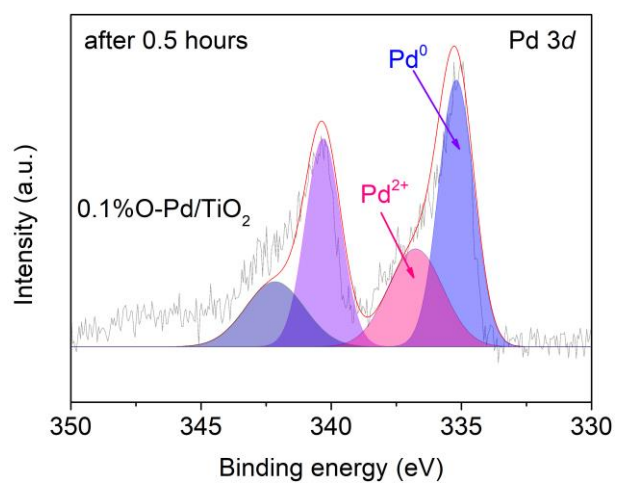

Supplementary Figure 7. XPS Characterization of catalyst after reaction. Pd 3d XPS spectra of 0.1%O-Pd/TiO<sub>2</sub> catalysts after 0.5 hours reactions.



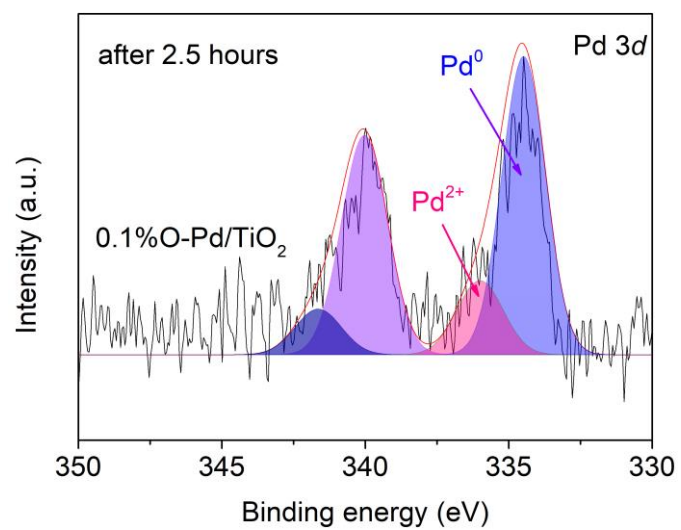

Supplementary Figure 8. XPS Characterization of catalyst after reaction. Pd 3d XPS spectra of 0.1%O-Pd/TiO<sub>2</sub> catalysts after 2.5 hours reactions.

● Ti ● O ● Pd

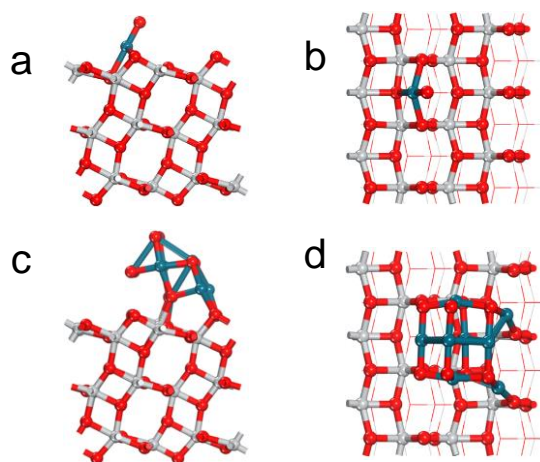

Supplementary Figure 9. Models of single atom and cluster. (a) Side view (b) Top view of Pd<sub>1</sub>/TiO<sub>2</sub> (c) Side view (d) Top view of Pd<sub>8</sub>O<sub>8</sub>/TiO<sub>2</sub>

● Ti ● O ● Pd

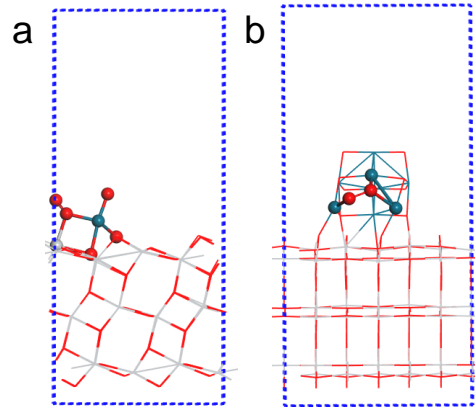

Supplementary Figure 10. O<sub>2</sub> adsorption configuration after structure optimization. (a).Pd<sub>1</sub>/TiO<sub>2</sub>,(b).Pd<sub>8</sub>O<sub>8</sub>/TiO<sub>2</sub>

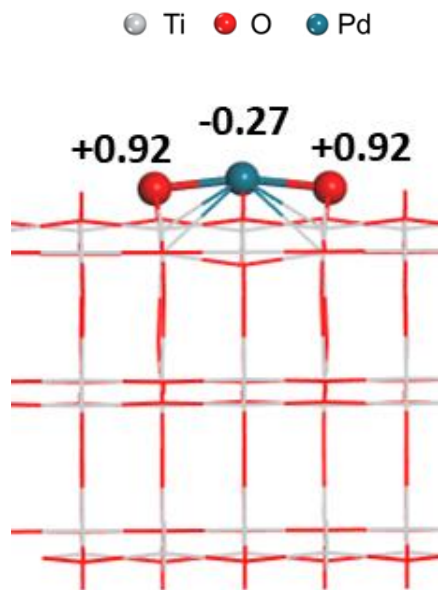

Supplementary Figure 11. Bader charge analysis. The oxidation state of Pd single atom estimated by bader charge analysis.

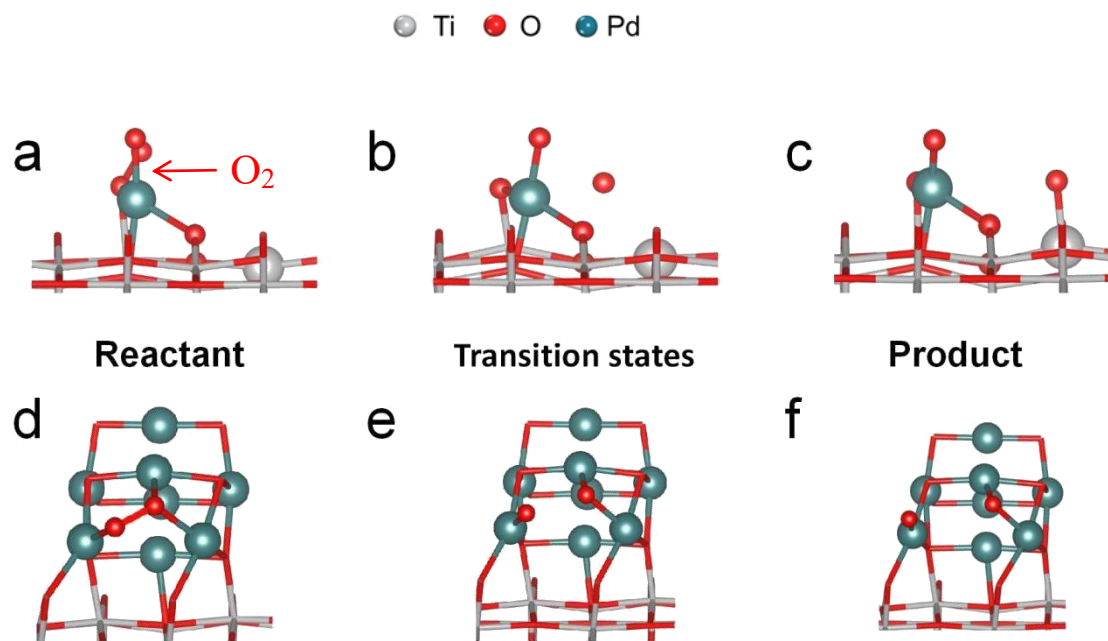

Supplementary Figure 12. The structural configurations of adsorbed  $^*O_2$  dissociation steps. (a,b,c)  $Pd_1/TiO_2$  and (d,e,f)  $Pd_8O_8/TiO_2$ .

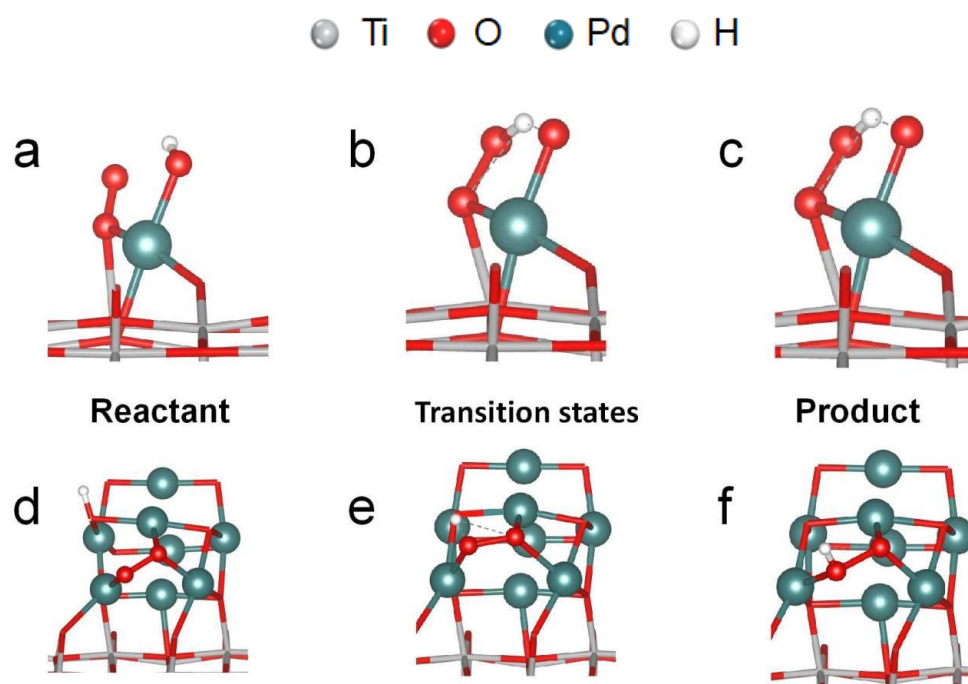

Supplementary Figure 13. The structural configurations of adsorbed adsorbed  $^*O_2$  hydrogenation to  $OOH^*$  steps. (a,b,c)  $Pd_1/TiO_2$  and (d,e,f)  $Pd_8O_8/TiO_2$ .

Supplementary Table 1. EXAFS fitting parameters at the Pd K-edge for various samples ( $S_0^2=0.80$ )<sup>a</sup>

|                               | shell  | CN      | R(Å)      | $\sigma^2$ | $\Delta E_0$ | R factor |
|-------------------------------|--------|---------|-----------|------------|--------------|----------|
| Pd foil                       | Pd-Pd  | 12      | 2.74±0.01 | 0.0056     | -3.7±0.5     | 0.0051   |
| PdO                           | Pd-O   | 4.2±0.2 | 2.02±0.01 | 0.0016     | 3.1±1.0      | 0.0066   |
|                               | Pd-Pd  | 4.5±0.3 | 3.06±0.01 | 0.0037     |              |          |
|                               | Pd-Pd1 | 6.9±0.4 | 3.44±0.01 |            |              |          |
| 0.1%O-Pd/TiO <sub>2</sub>     | Pd-O   | 3.8±0.2 | 2.04±0.01 | 0.0049     | 6.3±1.7      | 0.0064   |
| 1% O-Pd/TiO <sub>2</sub>      | Pd-O   | 4.3±0.2 | 2.04±0.01 | 0.0039     | 5.8±1.4      | 0.0154   |
|                               | Pd-Pd  | 1.3±0.2 | 3.04±0.01 | 0.0013     |              |          |
|                               | Pd-Pd1 | 1.2±0.3 | 3.49±0.02 |            |              |          |
| 3% O-Pd/TiO <sub>2</sub> -450 | Pd-O   | 4.2±0.2 | 2.03±0.01 | 0.0033     | 4.2±0.9      | 0.0094   |
|                               | Pd-Pd  | 3.8±0.3 | 3.06±0.01 | 0.0061     |              |          |
|                               | Pd-Pd1 | 3.8±0.4 | 3.46±0.01 |            |              |          |

a: CN: coordination numbers; b: R: bond distance; c:  $\sigma^2$ : Debye-Waller factors; d:  $\Delta E_0$ : the inner potential correction. R factor: goodness of fit.  $S_0^2$  was set to 0.80, according to the experimental EXAFS fit of Pd foil reference by fixing CN as the known crystallographic value;  $\delta$ : percentage.

Supplementary Table 2. H<sub>2</sub>O<sub>2</sub> degradation test on TiO<sub>2</sub> support itself <sup>a</sup>

| H <sub>2</sub> O <sub>2</sub> degradation<br>(mol/kg <sub>cat</sub> /h) |       |       |       |       |       |       |
|-------------------------------------------------------------------------|-------|-------|-------|-------|-------|-------|
| TiO <sub>2</sub>                                                        | 0.5 h | 1.0 h | 1.5 h | 2.0 h | 2.5 h | 3.0 h |
|                                                                         | n.d   | n.d   | n.d   | n.d   | n.d   | n.d   |

a: H<sub>2</sub>O<sub>2</sub> degradation was under standard reaction conditions: 5% H<sub>2</sub>/CO<sub>2</sub> (3.0 MPa), 8.5 g solvent (2% H<sub>2</sub>O<sub>2</sub>-8% H<sub>2</sub>O<sub>2</sub>), 2.5-10 mg TiO<sub>2</sub>, 2°C, 1200 rpm, reaction time: 0.5 hour to 3 hours. n.d=not detected. 2% H<sub>2</sub>O<sub>2</sub>(5.6 g CH<sub>3</sub>OH, 2.34 g H<sub>2</sub>O, and 0.56 g 30% H<sub>2</sub>O<sub>2</sub>), 4% H<sub>2</sub>O<sub>2</sub>(5.6g CH<sub>3</sub>OH, 1.77 g H<sub>2</sub>O, and 1.13 g 30% H<sub>2</sub>O<sub>2</sub>); 8% H<sub>2</sub>O<sub>2</sub>(5.6g CH<sub>3</sub>OH, 0.63 g H<sub>2</sub>O, and 2.27 g 30% H<sub>2</sub>O<sub>2</sub>).



Supplementary Table 3. H<sub>2</sub>O<sub>2</sub> degradation test on various catalysts.<sup>a</sup>

| Entry | Catalyst                      | 2%H <sub>2</sub> O <sub>2</sub><br>(mol/kg <sub>cat</sub> /h) | 4%H <sub>2</sub> O <sub>2</sub><br>(mol/kg <sub>cat</sub> /h) | 8%H <sub>2</sub> O <sub>2</sub><br>(mol/kg <sub>cat</sub> /h) |
|-------|-------------------------------|---------------------------------------------------------------|---------------------------------------------------------------|---------------------------------------------------------------|
| 1     | 1%M-Pd/TiO <sub>2</sub>       | 518                                                           | 688                                                           | 850                                                           |
| 2     | 3%M-Pd/TiO <sub>2</sub>       | 714                                                           | 872                                                           | 969                                                           |
| 3     | 5%M-Pd/TiO <sub>2</sub>       | 867                                                           | 1024                                                          | 1130                                                          |
| 4     | 9%Pd/C                        | 1054                                                          | 1215                                                          | 1292                                                          |
| 5     | 0.05%-3%O-Pd/TiO <sub>2</sub> | n.d.                                                          | n.d.                                                          | n.d.                                                          |

a: H<sub>2</sub>O<sub>2</sub> degradation was under standard reaction conditions: 5% H<sub>2</sub>/CO<sub>2</sub> (3.0 MPa), 8.5 g solvent, 2.5 mg catalyst, 2°C, 1200 rpm, 30 min. n. d., not detected. 2% H<sub>2</sub>O<sub>2</sub>(5.6 g CH<sub>3</sub>OH, 2.34 g H<sub>2</sub>O, and 0.56 g 30% H<sub>2</sub>O<sub>2</sub>). 4% H<sub>2</sub>O<sub>2</sub>(5.6g CH<sub>3</sub>OH, 1.77 g H<sub>2</sub>O, and 1.13 g 30% H<sub>2</sub>O<sub>2</sub>); 8% H<sub>2</sub>O<sub>2</sub>(5.6g CH<sub>3</sub>OH, 0.63 g H<sub>2</sub>O, and 2.27 g 30% H<sub>2</sub>O<sub>2</sub>).

Supplementary Table 4. H<sub>2</sub>O<sub>2</sub> degradation test under different atmospheres.<sup>a</sup>

| Entry | Catalyst                               | H <sub>2</sub> O <sub>2</sub> degradation<br>(mol/kg <sub>cat</sub> /h) |       |       |       |       |       |
|-------|----------------------------------------|-------------------------------------------------------------------------|-------|-------|-------|-------|-------|
|       |                                        | 0.5 h                                                                   | 1.0 h | 1.5 h | 2.0 h | 2.5 h | 3.0 h |
| 1     | 0.1%O-Pd/TiO <sub>2</sub> <sup>a</sup> | n.d                                                                     | n.d   | n.d   | n.d   | n.d   | n.d   |
| 2     | 1%M-Pd/TiO <sub>2</sub> <sup>a</sup>   | 518                                                                     | 442   | 371   | 319   | 294   | 291   |
| 3     | 5%M-Pd/TiO <sub>2</sub> <sup>a</sup>   | 867                                                                     | 590   | 484   | 414   | 376   | 367   |
| 4     | 0.1%O-Pd/TiO <sub>2</sub> <sup>b</sup> | n.d                                                                     | n.d   | n.d   | n.d   | n.d   | n.d   |
| 5     | 1%M-Pd/TiO <sub>2</sub> <sup>b</sup>   | n.d                                                                     | n.d   | n.d   | n.d   | n.d   | n.d   |
| 6     | 0.1%O-Pd/TiO <sub>2</sub> <sup>c</sup> | n.d                                                                     | n.d   | n.d   | n.d   | n.d   | n.d   |
| 7     | 1%M-Pd/TiO <sub>2</sub> <sup>c</sup>   | n.d                                                                     | n.d   | n.d   | n.d   | n.d   | n.d   |
| 8     | 0.1%O-Pd/TiO <sub>2</sub> <sup>d</sup> | n.d                                                                     | n.d   | n.d   | n.d   | n.d   | n.d   |

a: 5% H<sub>2</sub>/CO<sub>2</sub> (3.0 MPa), b: 25% O<sub>2</sub>/CO<sub>2</sub> (3.0 MPa).c: pure N<sub>2</sub> (3.0 MPa), d:5%H<sub>2</sub>/N<sub>2</sub> ,8.5 g solvent (5.6 g CH<sub>3</sub>OH, 2.34 g H<sub>2</sub>O, and 0.56 g 30% H<sub>2</sub>O<sub>2</sub>), 2.5 mg catalyst, 2°C, 1200 rpm. n. d., not detected.

Supplementary Table 5. A summary of some relevant DFT work.

| Entry | Refence                                                        | *O <sub>2</sub> →2O* | *O <sub>2</sub> +H*→OOH* | *OOH+*H→<br>H <sub>2</sub> O <sub>2</sub> * | *OOH→*OH+O* |
|-------|----------------------------------------------------------------|----------------------|--------------------------|---------------------------------------------|-------------|
| 1     | Pd(111)<br>[1]                                                 | 0.70 eV              | 0.68 eV                  | 0.58 eV                                     | 0.11 eV     |
| 2     | PdO(101)<br>[1]                                                | 1.81 eV              | 0.03 eV                  | 0.46 eV                                     | 1.33 eV     |
| 3     | Pd(111)<br>[2]                                                 | 0.78 eV              | 0.58 eV                  | 0.41 eV                                     | 0.33 eV     |
| 4     | Pd(100)<br>[2]                                                 | 0.16 eV              | 0.67 eV                  | 0.44 eV                                     | 0.26 eV     |
| 5     | Pd(111)<br>[3]                                                 | 0.63 eV              | 0.54 eV                  | 0.86 eV                                     | 0.11 eV     |
| 6     | β-<br>PdH(111) <sup>[3]</sup>                                  | 1.12 eV              | 0.22 eV                  | 0.17 eV                                     | 0.34 eV     |
| 7     | This work,<br>Pd <sub>1</sub> /TiO <sub>2</sub>                | 1.89 eV              | 0.81 eV                  | 0.16 eV                                     | 0.19 eV     |
| 8     | This work,<br>Pd <sub>8</sub> O <sub>8</sub> /TiO <sub>2</sub> | 1.08 eV              | 1.25 eV                  | 0.27 eV                                     | 0.35 eV     |

**Note** : Compared with the reported results of related DFT works, we find that the dissociation energy barrier of O-O bond on Pd<sub>1</sub>/TiO<sub>2</sub> (1.89eV) is the highest. In fact, it is controversial to compare the calculation results with different DFT literatures, because their calculation parameters and calculation system are different. However, the comparison is also useful for reference.

### Supplementary References

- [1] Fang Wang. et al. How Does the Oxidation State of Palladium Surfaces Affect the Reactivity and Selectivity of Direct Synthesis of Hydrogen Peroxide from Hydrogen and Oxygen Gases? A Density Functional Study. *J. Am. Chem. Soc.* 141, 901-910 (2019).
- [2] Pengfei Tian. et al. Density functional theory study of direct synthesis of H<sub>2</sub>O<sub>2</sub> from H<sub>2</sub> and O<sub>2</sub> on Pd (111), Pd (100), and Pd (110) surfaces. *Chinese Journal of Catalysis.* 34, 1002-1012 (2013).
- [3] Lin Chen. et al. On the Reaction Mechanism of Direct H<sub>2</sub>O<sub>2</sub> Formation over Pd Catalysts. *ACS Catalysis.* 11, 2735-2745 (2021).
